# Supplementary material for: Sequence Conservation, Radial Distance and Packing Density in Spherical Viral Capsids
Source: PubMed Central journal article supplement (PMC4488880; doi:10.1371/journal.pone.0132234), 2015-07-01

**Figure S1. The capsid crystal structures of viruses in three surface representations.** The conservation surface representation is shown on the left, the centroid surface representation in the middle, and the WCN surface representation on the right.

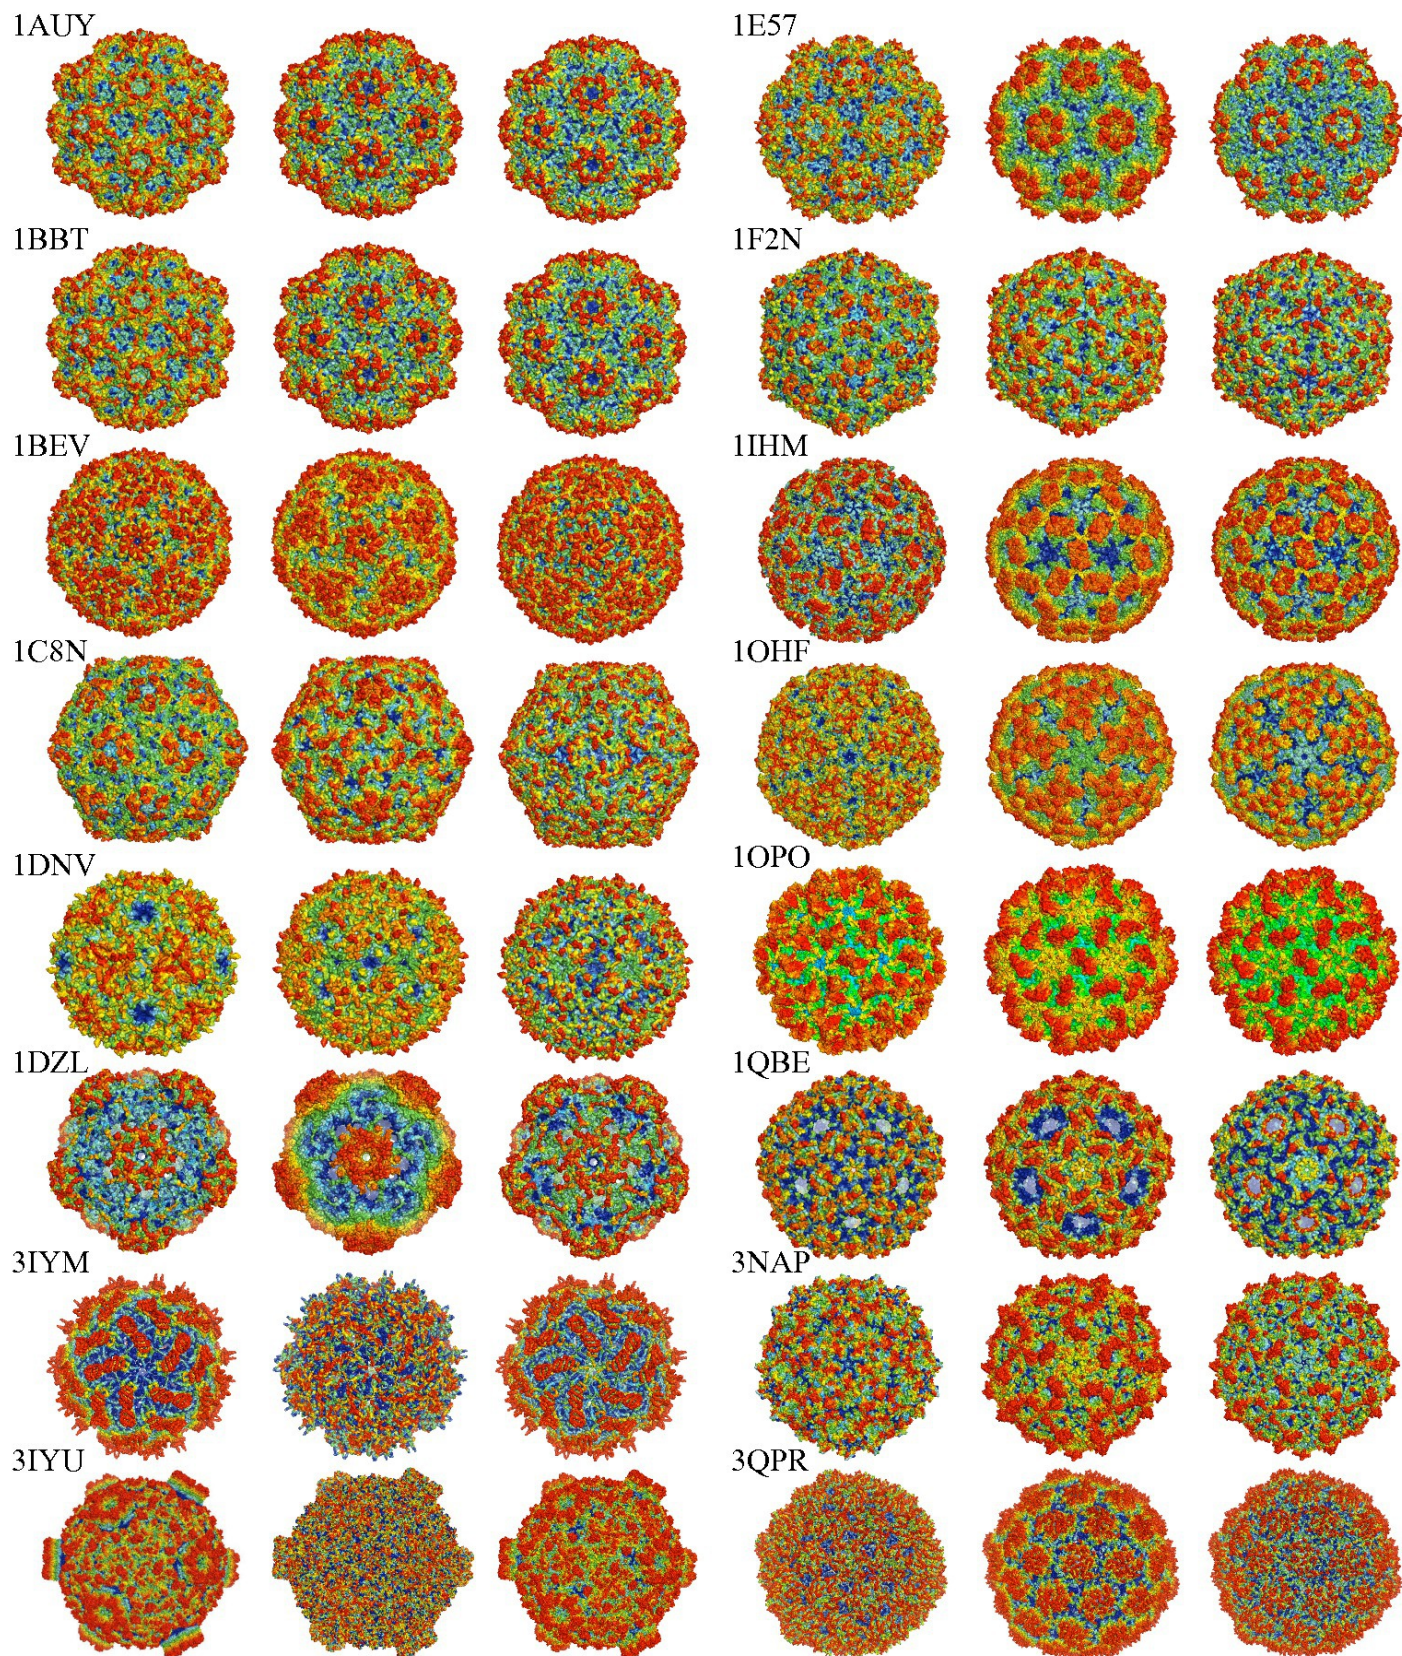

1QGT

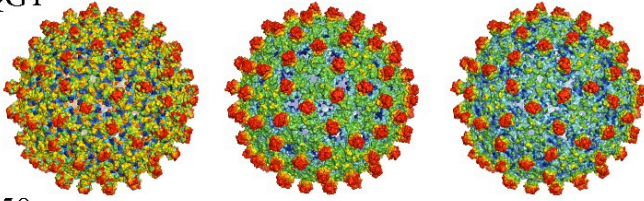

1S58

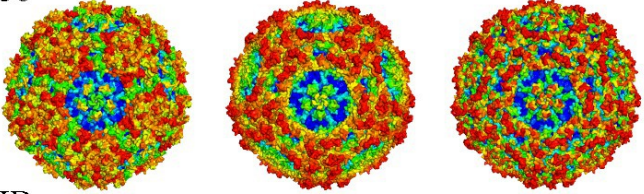

1SID

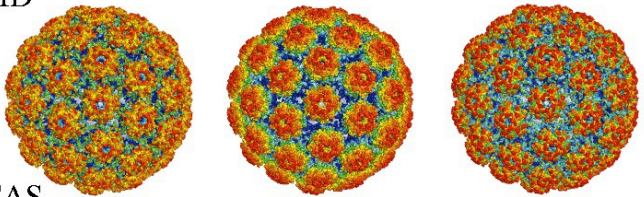

2CAS

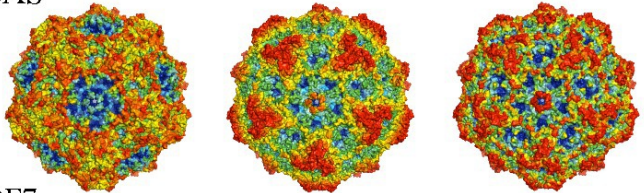

2DF7

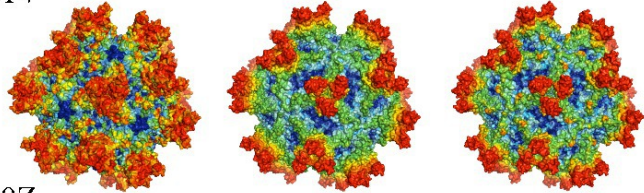

2E0Z

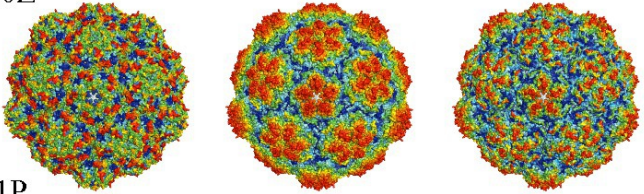

3J1P

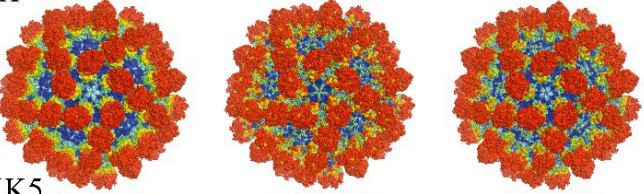

3KK5

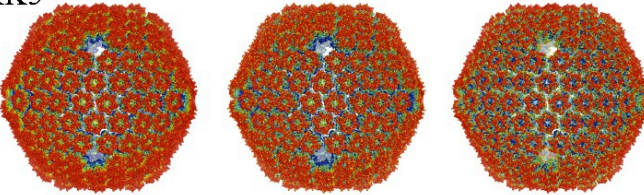

2GH8

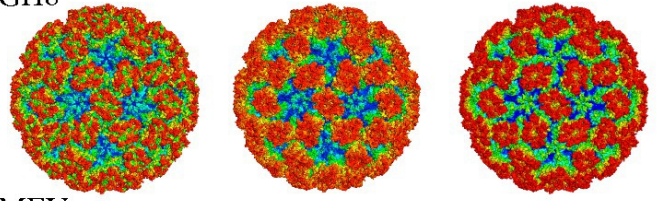

2MEV

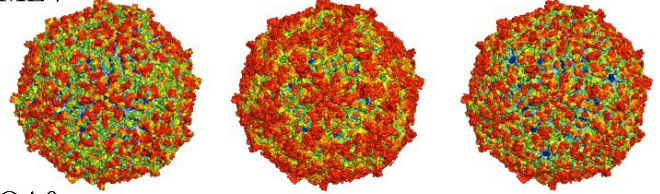

2QA0

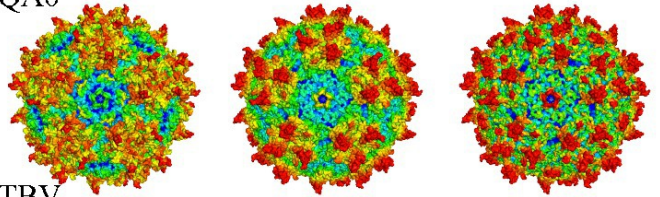

2TBV

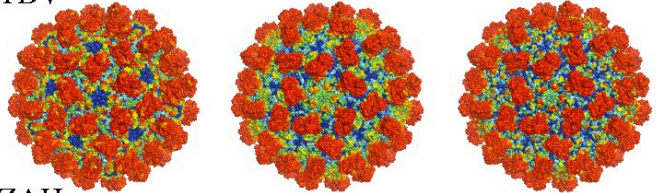

2ZAH

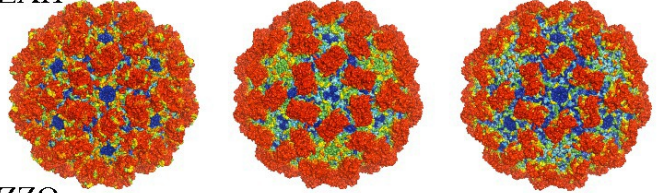

2ZZQ

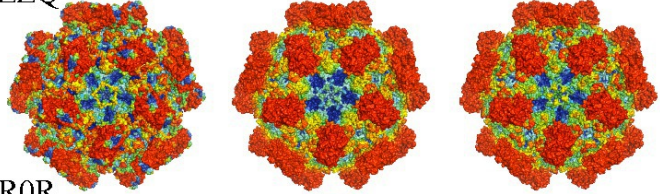

3R0R

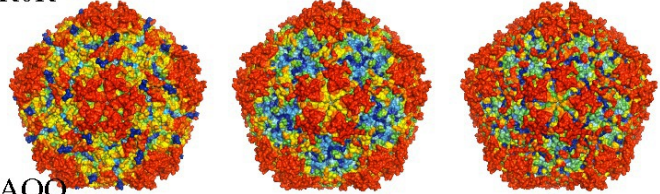

4AQQ

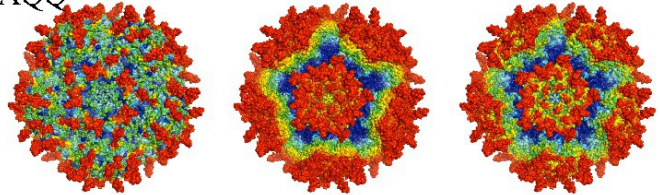

Supplement: pone.0132234.s001.pdf [file pone.0132234.s001.pdf]
