# Supplementary material for: Sequence Conservation, Radial Distance and Packing Density in Spherical Viral Capsids
Source: PubMed Central journal article supplement (PMC4488880; doi:10.1371/journal.pone.0132234), 2015-07-01

**Figures S2. Comparison of different profiles.** Comparison of the radius distribution profile (solid line) and conservation profile (dotted line) (the top plot under the PDB ID) and the WCN profile (solid line) and the conservation profile (dotted line) (the bottom plot under the PDB ID).

1AL0\_1

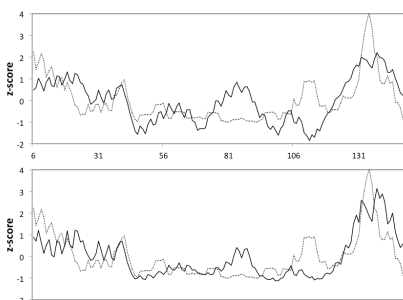

1BEV\_3

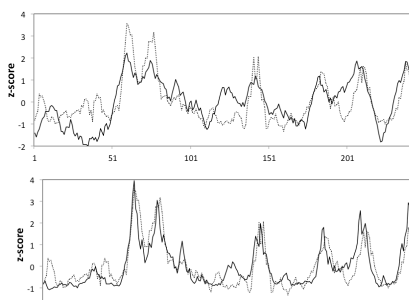

1DZL\_A

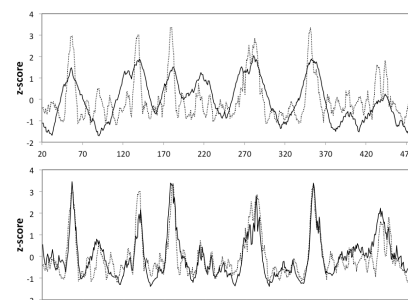

1AUY\_A

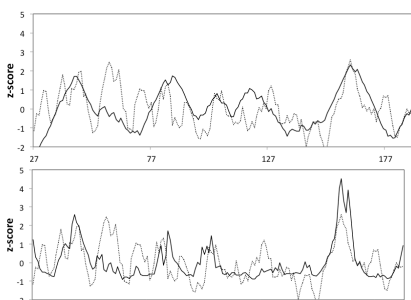

1BMV\_1

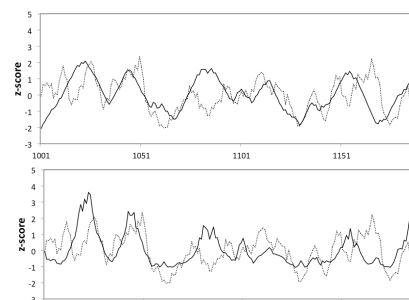

1E57\_A

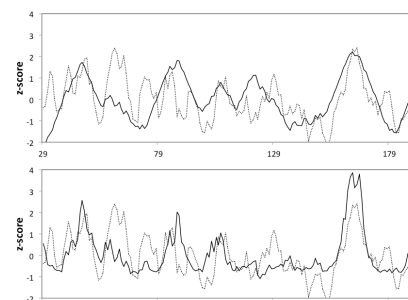

1B35\_B

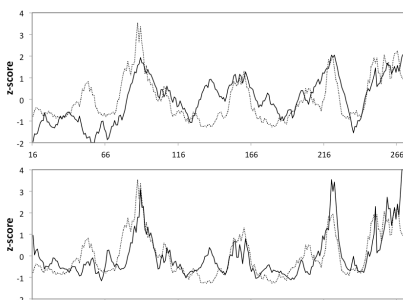

1C8N\_A

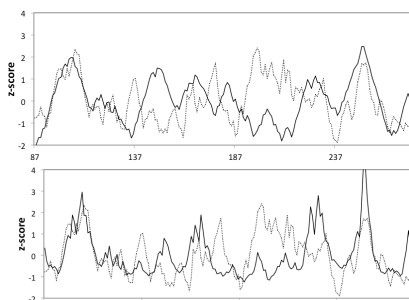

1F2N\_A

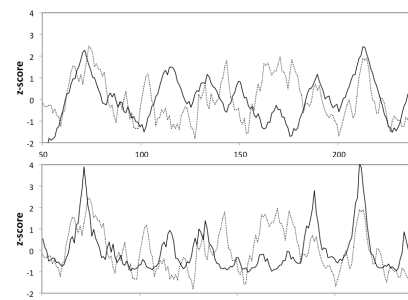

1BBT\_1

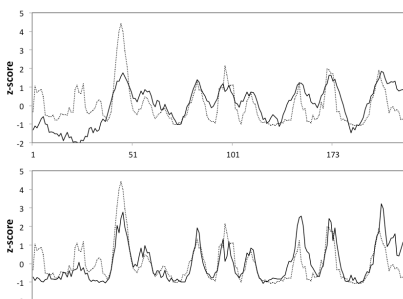

1DNV\_A

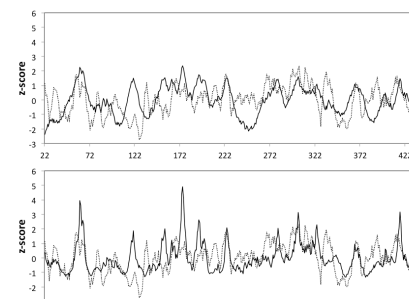

1IHM\_A

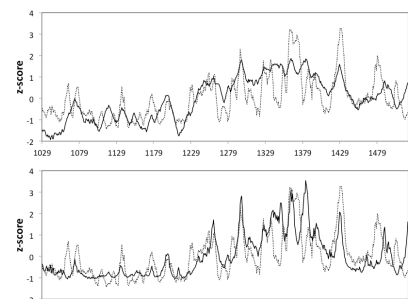

1M06\_G

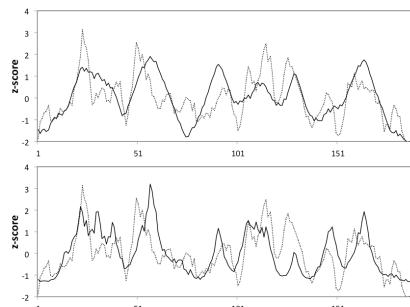

1QGT\_C

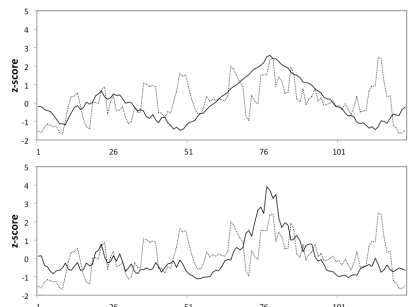

2BTV\_C

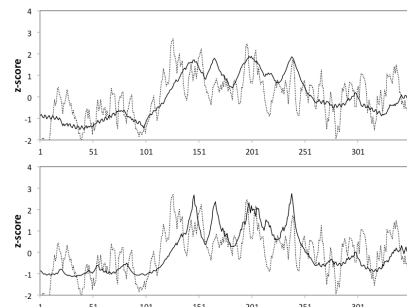

1OHF\_A

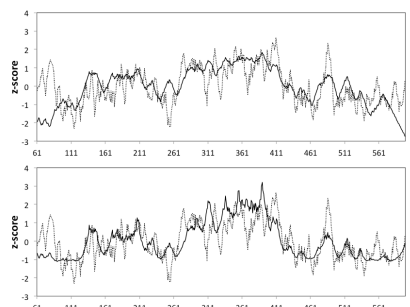

1S58\_A

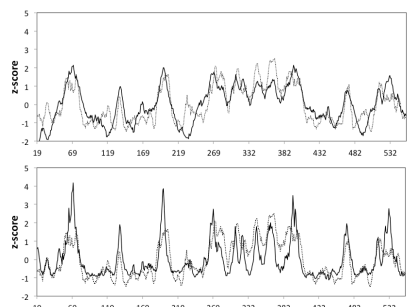

2CAS\_A

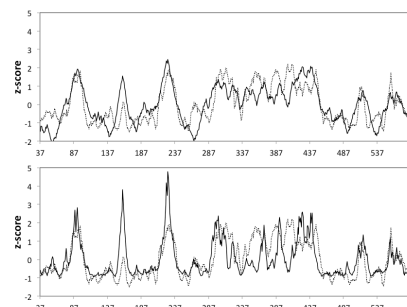

1OPO\_A

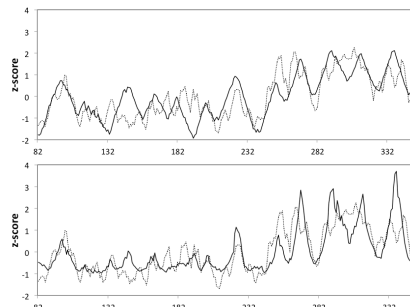

1SID\_A

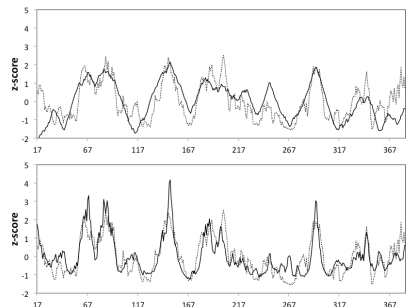

2DF7\_A

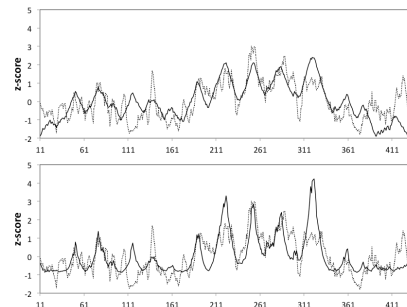

1QBE\_A

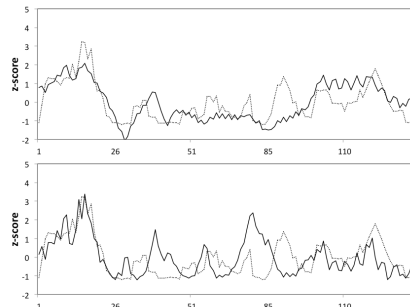

1VSZ\_A

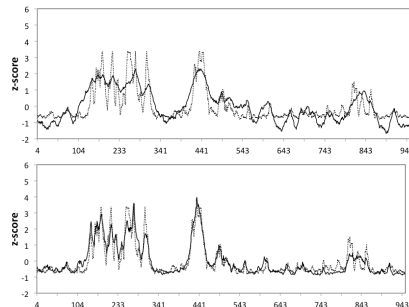

2E0Z\_A

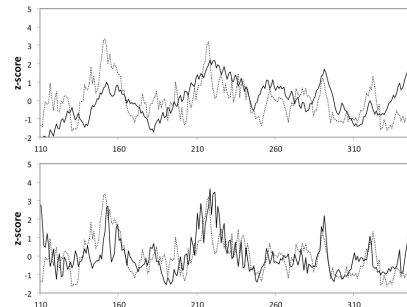

3J1Q\_A

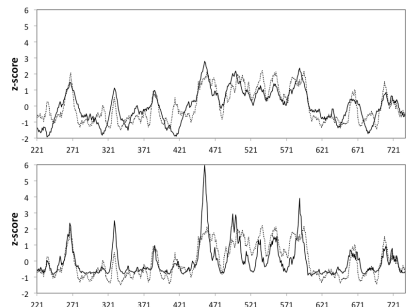

3NAP\_B

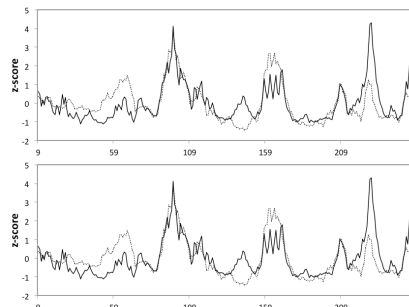

4AN5\_A

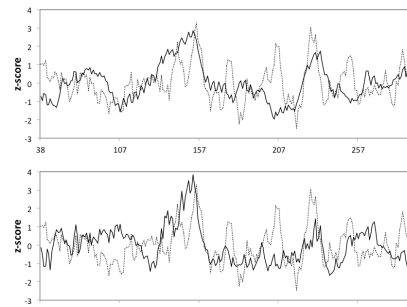

2GH8\_A

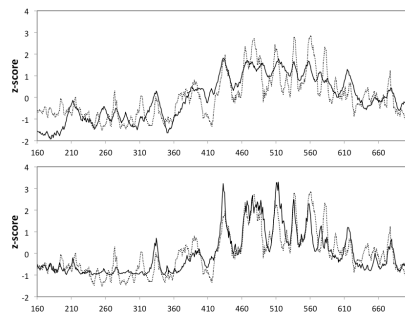

2VF9\_A

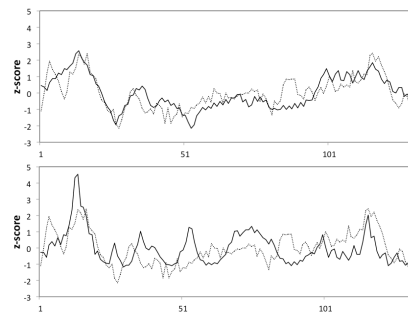

2ZZQ\_A

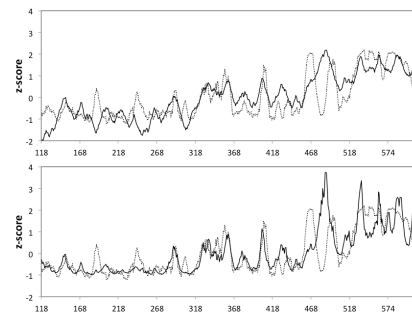

2MEV\_1

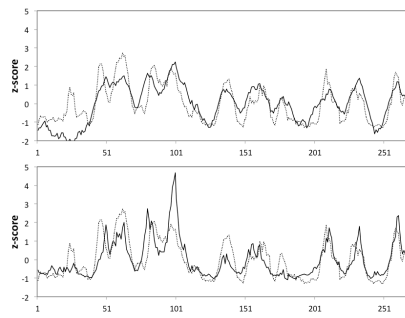

2WFF\_1

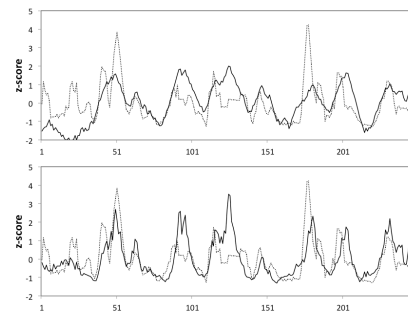

3CJI\_C

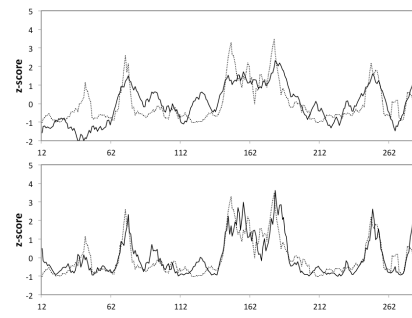

2QA0\_A

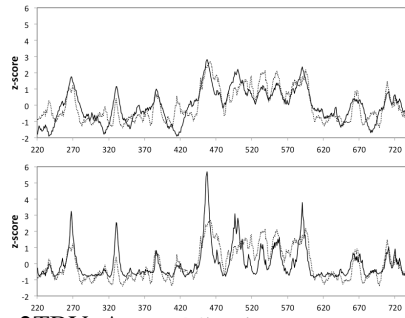

2X8Q\_A

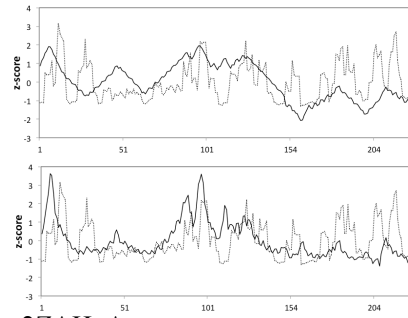

3DPR\_E

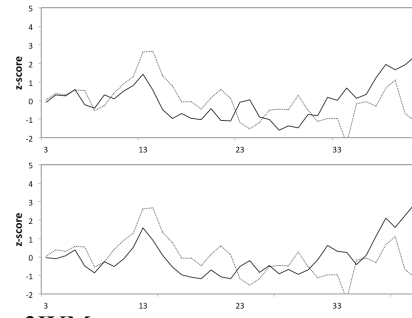

2TBV\_A

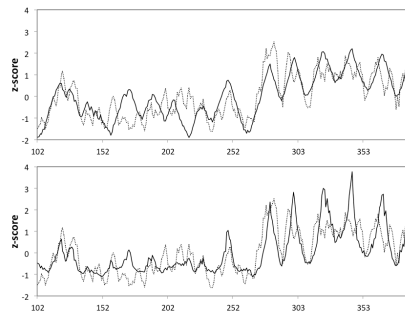

2ZAH\_A

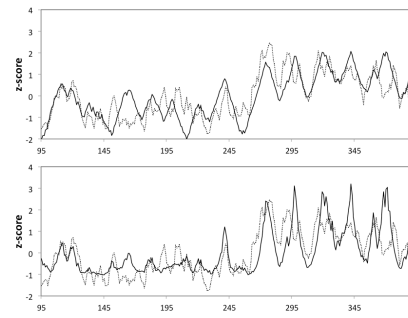

3IYM\_A

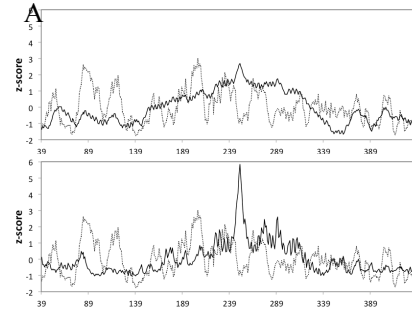

3JIP\_A

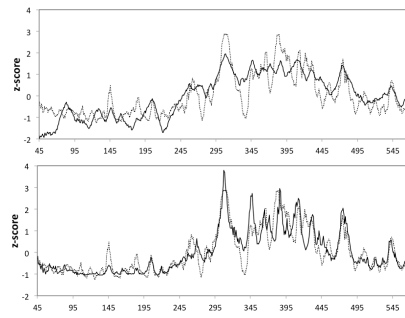

3N09\_C

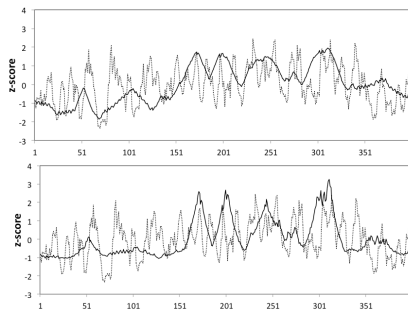

3ZX8\_A

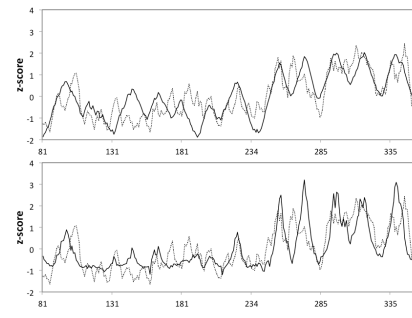

3IYO\_A

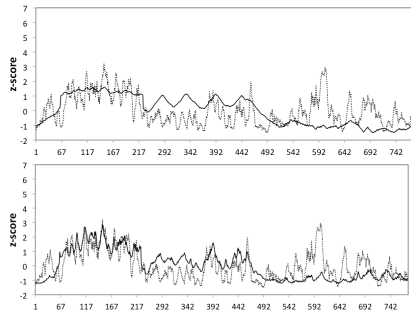

3J40\_H

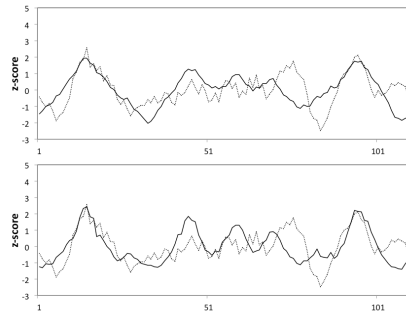

3QPR\_A

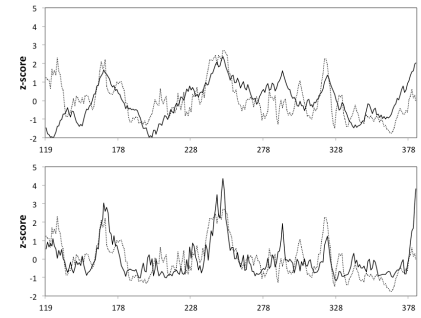

3IZX\_D

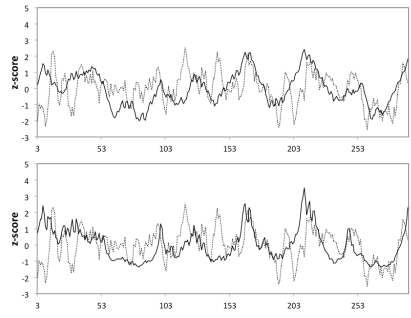

3KK5\_A

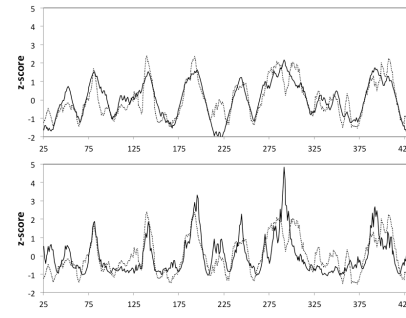

3R0R\_A

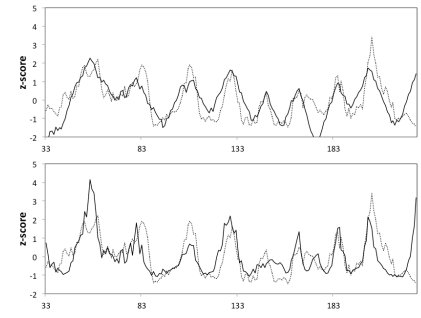

4AQQ\_A

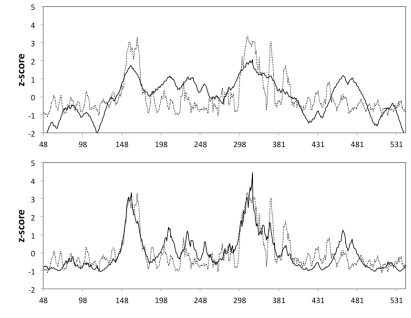

4FTS\_A

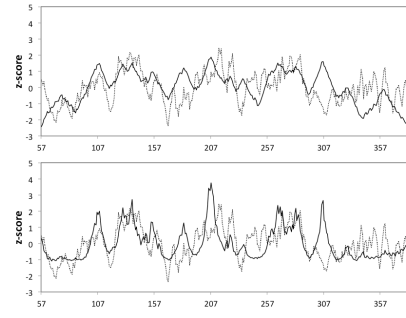

4G0R\_A

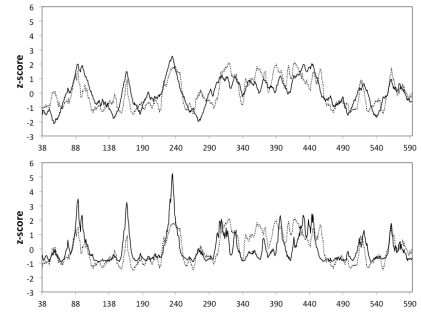

Supplement: pone.0132234.s002.pdf [file pone.0132234.s002.pdf]
