# Supplementary material for: Sequence Conservation, Radial Distance and Packing Density in Spherical Viral Capsids
Source: PubMed Central journal article supplement (PMC4488880; doi:10.1371/journal.pone.0132234), 2015-07-01
Supplement: pone.0132234.s003.pdf [file pone.0132234.s003.pdf]

**Table S1. 51 capsid viruses<sup>1</sup>**

| PDB ID | T number | Number of subunits | Average radius (Å) | Host     | Family           | Genus               |
|--------|----------|--------------------|--------------------|----------|------------------|---------------------|
| 1AL0   | 1        | 420                | 173                | Bacteria | Microviridae     | Microvirus          |
| 1AUY   | 3        | 180                | 152                | Plant    | Tymoviridae      | Tymovirus           |
| 1B35   | pT3      | 240                | 160                | insect   | Dicistroviridae  | Cripavirus          |
| 1BBT   | pT3      | 240                | 149                | Human    | Picornaviridae   | Aphthovirus:        |
| 1BEV   | pT3      | 240                | 154                | Animal   | Picornaviridae   | Enterovirus         |
| 1BMV   | pT3      | 120                | 150                | Plant    | Comoviridae      | Comovirus           |
| 1C8N   | 3        | 180                | 155                | Plant    | Tombusviridae    | Necrovirus          |
| 1DNV   | 1        | 60                 | 130                | Insect   | Parvoviridae     | Densovirus          |
| 1DZL   | 1        | 60                 | 158                | Human    | Papillomaviridae | Alphapapillomavirus |
| 1E57   | 3        | 180                | 156                | Plant    | Tymoviridae      | Tymovirus           |
| 1F2N   | 3        | 180                | 150                | Plant    | Sobemoviridae    | Sobemovirus         |
| 1IHM   | 3        | 180                | 199                | Animal   | Caliciviridae    | Norovirus           |
| 1M06   | 1        | 180                | 170                | Bacteria | Microviridae     | Microvirus          |
| 1OHF   | 4        | 240                | 211                | Animal   | Tetraviridae     | Omegatetravirus     |
| 1OPO   | 3        | 180                | 176                | Plant    | Tombusviridae    | Carmovirus          |
| 1QBE   | 3        | 180                | 143                | Bacteria | Leviviridae      | Allolevivirus       |
| 1QGT   | 4        | 240                | 175                | Human    | Hepadnaviridae   | Orthohepadnavirus   |
| 1S58   | 1        | 60                 | 135                | Human    | Parvoviridae     | Parvovirus          |
| 1SID   | 7d       | 360                | 252                | Animal   | Polyomaviridae   | Polyomavirus        |
| 1VSZ   | pT25     | 1200               | 458                | Human    | Adenoviridae     | Adenoviridae        |
| 2BTV   | 13       | 900                | 348                | Animal   | Reoviridae       | Orbivirus           |
| 2CAS   | 1        | 60                 | 138                | Animal   | Parvoviridae     | Parvovirus          |
| 2DF7   | 1        | 60                 | 135                | Animal   | Birnaviridae     | Avibirnavirus       |
| 2E0Z   | 2        | 180                | 185                | Bacteria | Thermococcaceae  | Pyrococcus          |
| 2GH8   | 3        | 180                | 206                | Animal   | Caliciviridae    | Vesivirus           |
| 2MEV   | pT3      | 240                | 154                | Human    | Picornaviridae   | Cardiovirus         |
| 2QA0   | 1        | 60                 | 137                | Human    | Parvoviridae     | Densovirus          |
| 2TBV   | 3        | 180                | 173                | Plant    | Tombusviridae    | Tombusvirus         |
| 2VF9   | 3        | 180                | 139                | Bacteria | Leviviridae      | Leviviridae         |
| 2WFF   | pT3      | 240                | 154                | Animal   | Picornaviridae   | Aphthovirus         |
| 2X8Q   | 1        | 60                 | 120                | Animal   | Retroviridae     | Alpharetrovirus     |
| 2ZAH   | 3        | 180                | 172                | Plant    | Tombusviridae    | Carmovirus          |
| 2ZZQ   | 1        | 60                 | 130                | Animal   | Hepeviridae      | Hepevirus           |
| 3CJI   | pT3      | 240                | 157                | Animal   | Picornaviridae   | Senecavirus         |
| 3DPR   | pT3      | 300                | 167                | Human    | Picornaviridae   | Enterovirus         |
| 3IYM   | 2        | 120                | 176                | Fungi    | Partitiviridae   | Partitivirus        |
| 3IYU   | 13       | 960                | 484                | Human    | Reoviridae       | Rotavirus           |
| 3IZX   | 1        | 300                | 299                | Insect   | Reoviridae       | Cypovirus           |
| 3J1P   | 3        | 180                | 216                | Animal   | Caliciviridae    | Lagovirus           |
| 3J1Q   | 1        | 60                 | 138                | Animal   | Parvoviridae     | Dependovirus        |
| 3J40   | 7        | 840                | 333                | Bacteria | Podoviridae      | Epsilon15-like      |
| 3KK5   | 27       | 780                | 370                | Protozoa | Mimiviridae      | Satellite           |
| 3N09   | 13       | 900                | 352                | Animal   | Reoviridae       | Rotavirus           |
| 3NAP   | pT3      | 180                | 164                | Insect   | Dicistroviridae  | Cripavirus          |
| 3QPR   | 7        | 420                | 254                | Bacteria | Siphoviridae     | Lambda-like viruses |
| 3R0R   | 1        | 60                 | 99                 | Animal   | Circoviridae     | Circoviridae        |
| 3ZX8   | 3        | 180                | 172                | Plant    | Tombusviridae    | Carmovirus          |
| 4AN5   | 7I       | 420                | 331                | Bacteria | Siphoviridae     | Lambda-like viruses |
| 4AQQ   | 1        | 60                 | 146                | Human    | Adenoviridae     | Mastadenovirus      |
| 4FTS   | 3        | 180                | 168                | Insect   | Nodaviridae      | Alphanodavirus      |
| 4G0R   | 1        | 120                | 140                | Human    | Parvoviridae     | Parvovirus          |

<sup>1</sup> Carrillo-Tripp, M. et al. VIPERdb(2): an enhanced and web API enabled relational database for structural virology. *Nucleic Acids Research* **37**, D436-D442, doi:Doi 10.1093/Nar/Gkn840 (2009).
